# Supplementary material for: Parallel subfunctionalisation of PsbO protein isoforms in angiosperms revealed by phylogenetic analysis and mapping of sequence variability onto protein structure
Source: PubMed Central journal article supplement (PMC4459440; doi:10.1186/s12870-015-0523-4), 2015-06-09
Supplement: 12870_2015_523_MOESM3_ESM.pdf [file 12870_2015_523_MOESM3_ESM.pdf]

Additional file 3: Number and divergence of expressed PsbO isoforms in the analyzed land plant species. Number of distinct *psbO* cDNA sequences found in EST databases and maximal number of different amino acid residues in mature proteins derived from these sequences.

|                             | Family                | Species                                        | Number of PsbO isoforms | Maximal number of different amino acid residues between any two isoforms <sup>a</sup> |
|-----------------------------|-----------------------|------------------------------------------------|-------------------------|---------------------------------------------------------------------------------------|
| Bryophyta                   | Funariaceae           | <i>Physcomitrella patens</i>                   | 4                       | 24                                                                                    |
| Lycopodiophyta              | Selaginellaceae       | <i>Selaginella moellendorffii</i>              | 1 <sup>b</sup>          |                                                                                       |
| Cycadophyta                 | Cycadaceae            | <i>Cycas rumphii</i>                           | 1                       |                                                                                       |
| Coniferophyta               | Cupressaceae          | <i>Cryptomeria japonica</i>                    | 1                       |                                                                                       |
|                             |                       | <i>Sequoia sempervirens</i>                    | 1                       |                                                                                       |
|                             | Pinaceae              | <i>Picea abies</i>                             | 1                       |                                                                                       |
|                             |                       | <i>Picea sitchensis</i>                        | 1                       |                                                                                       |
|                             |                       | <i>Pinus sylvestris</i>                        | 1                       |                                                                                       |
|                             |                       | <i>Pinus taeda</i>                             | 1                       |                                                                                       |
| Taxaceae                    | <i>Taxus baccata</i>  | 1                                              |                         |                                                                                       |
| monocots                    | Poaceae               | <i>Hordeum vulgare</i>                         | 1                       |                                                                                       |
|                             |                       | <i>Oryza sativa</i>                            | 1                       |                                                                                       |
|                             |                       | <i>Triticum aestivum</i>                       | 1                       |                                                                                       |
|                             |                       | <i>Zea mays</i>                                | 2                       | 6                                                                                     |
|                             | Zingiberaceae         | <i>Curcuma longa</i>                           | 2                       | 13                                                                                    |
|                             |                       | <i>Zingiber officinale</i>                     | 2                       | 12                                                                                    |
| dicots                      | Asteraceae            | <i>Artemisia annua</i>                         | 2                       | 13                                                                                    |
|                             | Brassicaceae          | <i>Arabidopsis thaliana</i>                    | 2                       | 11                                                                                    |
|                             |                       | <i>Brassica napus</i>                          | 5                       | 7                                                                                     |
|                             |                       | <i>Brassica oleracea</i>                       | 3                       | 9                                                                                     |
|                             |                       | <i>Brassica rapa</i>                           | 4                       | 7                                                                                     |
|                             |                       | <i>Thellungiella halophila</i>                 | 3                       | 10 (41) <sup>c</sup>                                                                  |
|                             | Euphorbiaceae         | <i>Manihot esculenta</i>                       | 2                       | 14                                                                                    |
|                             | Fabaceae              | <i>Glycine max</i>                             | 4                       | 13                                                                                    |
|                             |                       | <i>Lotus japonicus</i>                         | 2                       | 15                                                                                    |
|                             |                       | <i>Medicago truncatula</i>                     | 2                       | 12                                                                                    |
|                             |                       | <i>Phaseolus vulgaris</i>                      | 2                       | 7                                                                                     |
|                             | Linaceae              | <i>Linum usitatissimum</i>                     | 1 <sup>d</sup>          |                                                                                       |
|                             | Malvaceae             | <i>Gossypium raimondii</i>                     | 1                       |                                                                                       |
|                             |                       | <i>Theobroma cacao</i>                         | 1                       |                                                                                       |
|                             | Myrtaceae             | <i>Eucalyptus grandis</i>                      | 1                       |                                                                                       |
|                             | Phrymaceae            | <i>Mimulus guttatus</i>                        | 1                       |                                                                                       |
|                             | Rosaceae              | <i>Fragaria vesca</i>                          | 1                       |                                                                                       |
|                             |                       | <i>Malus domestica</i>                         | 2                       | 11                                                                                    |
|                             | Rutaceae              | <i>Citrus reticulata</i>                       | 1                       |                                                                                       |
|                             |                       | <i>Citrus sinensis</i>                         | 1                       |                                                                                       |
|                             |                       | <i>Citrus trifoliata</i>                       | 1                       |                                                                                       |
|                             | Salicaceae            | <i>Populus x canadensis</i>                    | 2                       | 23                                                                                    |
|                             |                       | <i>Populus deltoides</i>                       | 2                       | 23                                                                                    |
|                             |                       | <i>Populus trichocarpa x Populus deltoides</i> | 2                       | 22                                                                                    |
|                             |                       | <i>Populus trichocarpa</i>                     | 2                       | 20                                                                                    |
|                             | Solanaceae            | <i>Capsicum annuum</i>                         | 2                       | 18                                                                                    |
|                             |                       | <i>Nicotiana benthamiana</i>                   | 2                       | 12                                                                                    |
| <i>Nicotiana tabacum</i>    |                       | 4                                              | 14                      |                                                                                       |
| <i>Solanum habrochaites</i> |                       | 2                                              | 15                      |                                                                                       |
| <i>Solanum lycopersicum</i> |                       | 2                                              | 13                      |                                                                                       |
| <i>Solanum melongena</i>    |                       | 2                                              | 21                      |                                                                                       |
|                             |                       | <i>Solanum tuberosum</i>                       | 2                       | 12                                                                                    |
| Vitaceae                    | <i>Vitis vinifera</i> | 2                                              | 17                      |                                                                                       |

<sup>a</sup> in mature form (without a transit peptide)

<sup>b</sup> Two *psbO* sequences of *S. moellendorffii* can be found in EST databases. One of them (PlantGDB: PUT-165a-Selaginella\_moellendorffii-12671) has far different mutation rate and seems to be a slightly expressed pseudogene, thus was omitted from analyses.

<sup>c</sup> Two isoforms of *T. halophila* that are most similar to isoforms of *A. thaliana* have only 10 different amino acid residues, another, the most diverged isoform, is orthologous to a truncated pseudogene of *A. thaliana*.

<sup>d</sup> *L. usitatissimum* expresses two *psbO* genes, but the corresponding mature proteins have the same amino acid sequence.
