# Supplementary material for: Parallel subfunctionalisation of PsbO protein isoforms in angiosperms revealed by phylogenetic analysis and mapping of sequence variability onto protein structure
Source: PubMed Central journal article supplement (PMC4459440; doi:10.1186/s12870-015-0523-4), 2015-06-09
Supplement: 12870_2015_523_MOESM4_ESM.pdf [file 12870_2015_523_MOESM4_ESM.pdf]

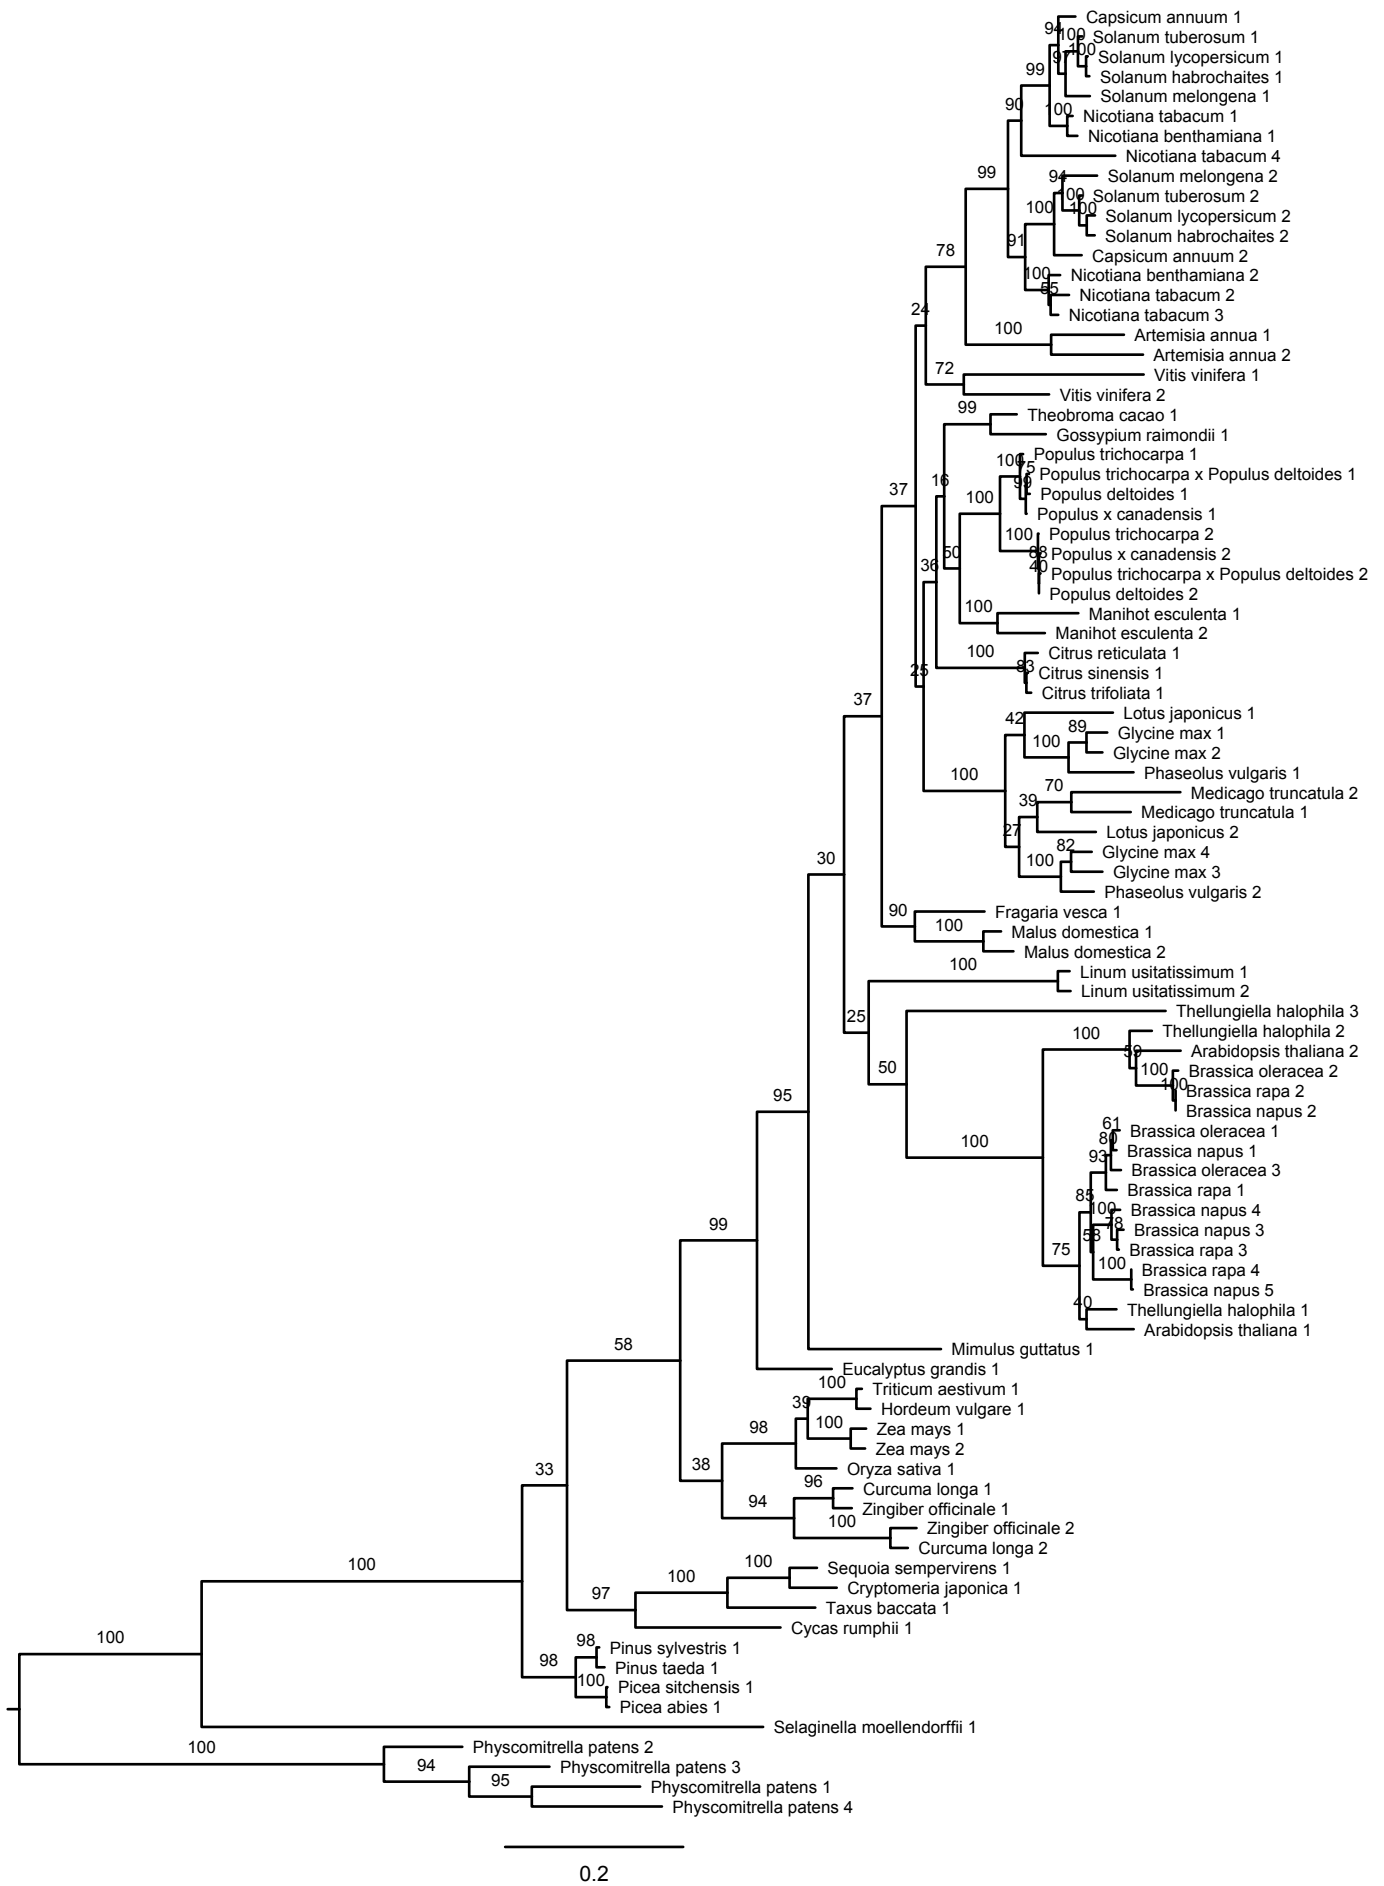

Additional file 4: A phylogenetic tree from coding sequences of *psbO* genes from 49 land plant species. The tree was constructed by the maximum likelihood method, numbers at branches denote bootstrap percentages.
