# Supplementary material for: Parallel subfunctionalisation of PsbO protein isoforms in angiosperms revealed by phylogenetic analysis and mapping of sequence variability onto protein structure
Source: PubMed Central journal article supplement (PMC4459440; doi:10.1186/s12870-015-0523-4), 2015-06-09
Supplement: 12870_2015_523_MOESM7_ESM.pdf [file 12870_2015_523_MOESM7_ESM.pdf]

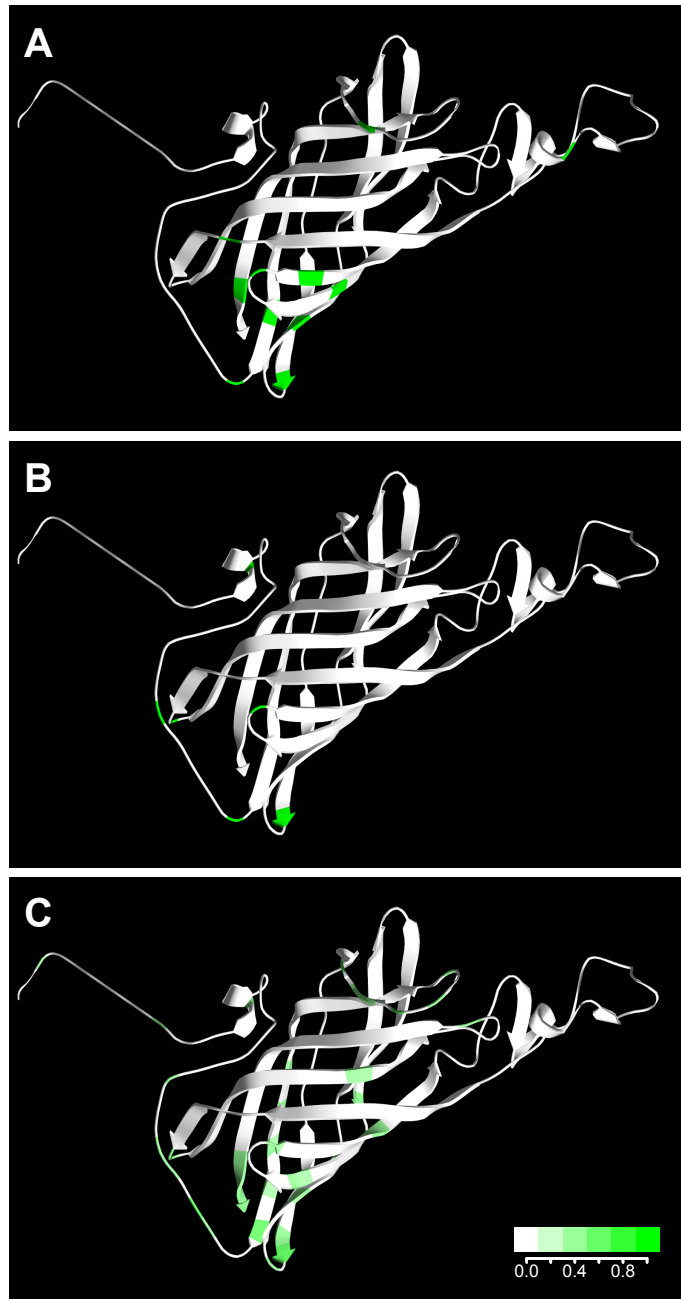

Additional file 7: Mapping differences between isoforms on PsbO structure in selected species. Differences between isoforms of (A) *A. thaliana*, (B) *Zea mays* and (C) *Physcomitrella patens* are shown in green. The homologous model of the *Solanum tuberosum* PsbO2 based on the X-ray structure of cyanobacterial PsbO [PDB:3ARC] [5] was constructed using Swiss-Model program [38]; the first 13 N-terminal amino acids were not present in the template structure, so they were pasted in the model without attempts to show any folding.
